# Supplementary material for: A Metabolomics Analysis of Adiposity and Advanced Prostate Cancer Risk in the Health Professionals Follow-Up Study
Source: PubMed Central journal article supplement (PMC7142752; doi:10.3390/metabo10030099), 2020-03-10
Supplement: metabolites-10-00099-s001.pdf [file metabolites-10-00099-s001.pdf]

## Supplementary Materials

### File S1

|                                                                                                                                       |    |
|---------------------------------------------------------------------------------------------------------------------------------------|----|
| Detail on metabolite profiling .....                                                                                                  | 2  |
| Detail on excluded metabolites .....                                                                                                  | 4  |
| Detail on included metabolites .....                                                                                                  | 8  |
| <b>Figure S1</b> Flowchart of participant selection .....                                                                             | 10 |
| <b>Figure S2</b> Flowchart of metabolite selection .....                                                                              | 11 |
| <b>Figure S3</b> Overlap in identified metabolites across adiposity measures .....                                                    | 14 |
| <b>Table S1</b> Metabolites associated with adiposity measures, restricting to men with<br>data on all three adiposity measures ..... | 15 |
| <b>Table S2</b> Metabolites associated with adiposity measures, restricting to men with<br>fasting blood samples .....                | 18 |
| <b>File S2.</b> Lasso models used for predicting adiposity using associated metabolites .....                                         | 21 |

## File S1.

### Detail on metabolite profiling

Plasma metabolites were profiled at the Broad Institute (Cambridge, MA) using liquid chromatography tandem mass spectrometry (LC-MS) methods previously described.<sup>15,16</sup> Briefly, nontargeted, positive ion mode analyses of polar metabolites were conducted using a Nexera X2 U-HPLC system (Shimadzu Scientific Instruments; Marlborough, MA) coupled to a Q Exactive orbitrap mass spectrometer (Thermo Fisher Scientific; Waltham, MA). Polar metabolites were extracted plasma (10  $\mu$ L) using 90 $\mu$ L of 74.9:24.9:0.2 v/v/v acetonitrile/methanol/formic acid containing stable isotope-labeled internal standards (valine-d8, Isotec; and phenylalanine-d8, Cambridge Isotope Laboratories; Andover, MA). The extracts were centrifuged (10 min, 9,000 x g, 4°C), and the supernatants were injected onto a 150 x 2 mm Atlantis HILIC column (Waters; Milford, MA). The column was eluted isocratically at a flow rate of 250  $\mu$ L/min with 5% mobile phase A (10 mM ammonium formate and 0.1% formic acid in water) for 1 minute followed by a linear gradient to 40% mobile phase B (acetonitrile with 0.1% formic acid) over 10 minutes. Polar metabolite MS analyses were carried out using electrospray ionization in the positive ion mode using full scan analysis over m/z 70-800 at 70,000 resolution and 3 Hz data acquisition rate. Additional MS settings were: ion spray voltage, 3.5 kV; capillary temperature, 350°C; probe heater temperature, 300 °C; sheath gas, 40; auxiliary gas, 15; and S-lens RF level 40. Polar metabolite identities were confirmed using authentic reference standards. Lipids were profiled using an LC-MS system comprised of a Shimadzu Nexera X2 U-HPLC (Shimadzu Corp.; Marlborough, MA) coupled to an Exactive Plus orbitrap mass spectrometer (Thermo Fisher Scientific; Waltham, MA). Plasma samples (10  $\mu$ L) were extracted for lipid analyses using 190  $\mu$ L of isopropanol containing 1,2-didodecanoyl-sn-glycero-3-phosphocholine as quality control internal standard (Avanti Polar Lipids; Alabaster, AL). After centrifugation, supernatants were injected directly onto a 100 x 2.1 mm, 1.7  $\mu$ m ACQUITY BEH C8 column (Waters; Milford, MA). The column was eluted isocratically with 80% mobile phase A (95:5:0.1 vol/vol/vol 10mM ammonium acetate/methanol/formic acid) for 1 minute followed by a linear gradient to 80% mobile-phase B (99.9:0.1 vol/vol methanol/formic acid) over 2 minutes, a linear gradient to 100% mobile phase B over 7 minutes, then 3 minutes at 100% mobile-phase B. MS analyses were carried out using electrospray ionization in the positive ion mode using full scan analysis over 200–1000 m/z at 70,000 resolution and 3 Hz data acquisition rate. Other MS settings were: sheath gas 50, in source CID 5 eV, sweep gas 5, spray voltage 3 kV, capillary temperature 300°C, S-lens RF 60, heater temperature 300°C, microscans 1, automatic gain control target 1e6, and maximum ion time 100 ms. Lipid identities were determined based on comparison to reference plasma extracts and were denoted by total number of carbons in the lipid acyl chain(s) and total number of double bonds in the lipid acyl chain(s). Raw data were processed using Progenesis Q1 software (NonLinear Dynamics) for feature alignment, nontargeted signal detection, and signal integration. Targeted processing of a subset of known metabolites was conducted using TraceFinder software (Thermo Fisher Scientific; Waltham, MA). Metabolite levels were reported as measured LC-MS peak areas, which are proportional to metabolite concentration.

A pilot study in the HPFS and Nurses' Health Study assessed the reliability of this platform using our archival plasma samples as well as within-person variability.<sup>16</sup> Most metabolites performed well, particularly lipids and lipid metabolites (coefficient of variation [CV] =8%, range 1-14%). Fasting status had little influence on the CVs. Almost 90% of metabolites were stable over two years within individuals.

Among known metabolites, we excluded 89 metabolites with mean CV>25% or ICC<0.4 based on quality control samples embedded in each project, 12 metabolites with undetectable levels for  $\geq 10\%$  of participants, and 42 metabolites that were not reproducible over delays in processing of blood samples (Spearman correlation and intraclass correlation coefficient <0.75, comparing immediate and 24-h delayed processing). We restricted to metabolites measured across all nested case-control studies, matching by HMDBID. This left 165 known metabolites for analysis. **Figure S2** includes details on metabolite selection. For metabolites with undetectable levels for <10% of participants, we imputed half the lowest value of the metabolite if the participant's sample was missing  $\leq 25\%$  of metabolites (which applied in all cases). Metabolite peak areas were  $\ln$ -transformed to improve normality and then standardized (to mean=0, SD=1) within each project to facilitate analyses across projects.

**Excluded metabolites before restricting to common metabolites across endpoints**

| <b>Basis for exclusion</b>                | <b>Metabolites</b>                                                                                                                                                                                                                                                                                                                                                                                                                                                                                                                                                                                                                                                                                                                                                                                                                                                                         |
|-------------------------------------------|--------------------------------------------------------------------------------------------------------------------------------------------------------------------------------------------------------------------------------------------------------------------------------------------------------------------------------------------------------------------------------------------------------------------------------------------------------------------------------------------------------------------------------------------------------------------------------------------------------------------------------------------------------------------------------------------------------------------------------------------------------------------------------------------------------------------------------------------------------------------------------------------|
| <p>CV&gt;25% or ICC&lt;0.4<br/>(n=89)</p> | <p>C36:4 hydroxy-PC-A<br/> C32:0 PE<br/> 1-methylhistamine<br/> 21-deoxycortisol<br/> 3-(N-acetyl-L-cystein-S-yl) acetaminophen<br/> 3-hydroxyanthranilic acid<br/> 3-methylhistidine<br/> 4-guanidinobutanoic acid<br/> 5-acetylamino-6-formylamino-3-methyluracil<br/> 5-hydroxytryptophan_isomer<br/> acetaminophen glucuronide<br/> acetyl-galactosamine<br/> acetylglycine<br/> adenosine<br/> allantoin<br/> aminoisobutyric acid<br/> anserine<br/> atenolol<br/> beta-alanine<br/> C16:1 LPC<br/> C16:1 MAG<br/> C18:0 MAG<br/> C18:1-OH carnitine<br/> C18:2 SM<br/> C20 carnitine<br/> C22:1 MAG<br/> C22:4 CE<br/> C3-DC-CH3 carnitine<br/> C32:0 PE<br/> C32:2 DAG<br/> C34:0 PI<br/> C34:1 DAG<br/> C34:2 PC<br/> C34:2 PE plasmalogen<br/> C34:5 PC plasmalogen<br/> C36:0 DAG<br/> C36:3 PS plasmalogen<br/> C36:4 hydroxy-PC-A<br/> C38:3 PE plasmalogen<br/> C40:6 PE</p> |

|  |                                                                                                                                                                                                                                                                                                                                                                                                                                                                                                                                                                                                                                                                                                                                                                   |
|--|-------------------------------------------------------------------------------------------------------------------------------------------------------------------------------------------------------------------------------------------------------------------------------------------------------------------------------------------------------------------------------------------------------------------------------------------------------------------------------------------------------------------------------------------------------------------------------------------------------------------------------------------------------------------------------------------------------------------------------------------------------------------|
|  | C44:13 PE plasmalogen<br>C47:0 TAG<br>C49:0 TAG<br>C5-DC carnitine<br>C54:10 TAG<br>C54:9 TAG<br>C60:12 TAG<br>C7 carnitine<br>cinnamoylglycine<br>citrulline<br>dehydrophytosphingosine<br>deoxycortisone<br>GABA<br>guanidoacetic acid<br>guanine_isomer<br>histamine<br>homocitrulline<br>homocysteine<br>hydroxyectoine<br>hydroxyproline<br>hypotaurine<br>indoleacetic acid<br>isoleucine<br>kynurenic acid<br>L-threo-sphingosine<br>metformin<br>methionine<br>methionine sulfoxide<br>metoprolol<br>N-acetylaspartic acid<br>N-carbamoyl-beta-alanine<br>NH4_C34:3 DAG<br>NH4_C38:5 DAG<br>NH4_C44:2 TAG<br>NH4_C46:3 TAG<br>pantothenol<br>phosphocholine<br>putrescine<br>pyridoxal<br>S-methyl-L-cysteine-S-oxide<br>SDMA<br>serotonin<br>sphingosine |
|--|-------------------------------------------------------------------------------------------------------------------------------------------------------------------------------------------------------------------------------------------------------------------------------------------------------------------------------------------------------------------------------------------------------------------------------------------------------------------------------------------------------------------------------------------------------------------------------------------------------------------------------------------------------------------------------------------------------------------------------------------------------------------|

|                                            |                                                                                                                                                                                                                                                                                  |
|--------------------------------------------|----------------------------------------------------------------------------------------------------------------------------------------------------------------------------------------------------------------------------------------------------------------------------------|
|                                            | sphingosine_isomer1<br>sphingosine_isomer2<br>sulfamethoxazole<br>thiamine<br>urobilinogen<br>urobilinogen_isomer<br>urocanic acid<br>xanthosine                                                                                                                                 |
| Missing for ≥10% of participants<br>(n=12) | C32:2 DAG<br>3-(N-acetyl-L-cystein-S-yl) acetaminophen<br>5-hydroxytryptophan_isomer<br>acetaminophen glucuronide<br>atenolol<br>C30:0 DAG<br>C40:6 PE<br>cotinine<br>hydroxycotinine<br>metoprolol<br>myristoleic acid<br>quinine                                               |
| Failed delayed processing pilot<br>(n=42)  | alpha-glycerophosphocholine<br>arginine<br>C14:0 CE<br>C16:0 CE<br>C16:0 LPC<br>C16:0 SM<br>C18:0 LPC<br>C18:0 MAG<br>C18:0 SM<br>C18:1 CE<br>C18:2 CE<br>C18:3 CE<br>C20:0 SM<br>C20:4 CE<br>C22:0 SM<br>C22:1 MAG<br>C24:0 SM<br>C24:1 SM<br>C32:0 PC<br>C32:2 DAG<br>C34:0 PC |

|  |                                                                                                                                                                                                                                                                                                                                              |
|--|----------------------------------------------------------------------------------------------------------------------------------------------------------------------------------------------------------------------------------------------------------------------------------------------------------------------------------------------|
|  | C34:1 PC plasmalogen-A<br>C34:2 PC<br>C34:3 PC<br>C34:3 PC plasmalogen<br>C34:4 PC<br>C36:0 DAG<br>C36:0 PC<br>C36:2 PC<br>C36:3 PC<br>C36:3 PC plasmalogen<br>C36:4 PC-A<br>C36:5 PC plasmalogen-B<br>C38:2 PC<br>C38:2 PE<br>C38:4 PC<br>C38:6 PC plasmalogen<br>C40:7 PC plasmalogen<br>glutamate<br>histamine<br>sphingosine<br>thiamine |
|--|----------------------------------------------------------------------------------------------------------------------------------------------------------------------------------------------------------------------------------------------------------------------------------------------------------------------------------------------|

**The 165 included metabolites and their categories after restricting to common metabolites across endpoints**

| <b>Category</b>                    | <b>Metabolites</b>                                                                                                                                                                                                                                                                                                                                                                                                                                                                                                                                                                                                                                                                                                                                                                                                                                                        |
|------------------------------------|---------------------------------------------------------------------------------------------------------------------------------------------------------------------------------------------------------------------------------------------------------------------------------------------------------------------------------------------------------------------------------------------------------------------------------------------------------------------------------------------------------------------------------------------------------------------------------------------------------------------------------------------------------------------------------------------------------------------------------------------------------------------------------------------------------------------------------------------------------------------------|
| Amino acid                         | Alanine, asparagine, glutamine, glycine, histidine, leucine, lysine, ornithine, phenylalanine, serine, threonine, tryptophan, tyrosine, valine                                                                                                                                                                                                                                                                                                                                                                                                                                                                                                                                                                                                                                                                                                                            |
| Carnitine                          | C10 carnitine (decanoylcarnitine), C10:2 carnitine (2-trans,4-cis-decadienoylcarnitine), C12 carnitine (dodecanoylcarnitine), C12:1 carnitine (trans-2-dodecenoylcarnitine), C14 carnitine (tetradecanoylcarnitine), C14:1 carnitine (cis-5-tetradecenoylcarnitine), C14:2 carnitine (3, 5-tetradecadienoylcarnitine), C18 carnitine (stearoylcarnitine), C18:1 carnitine (oleoylcarnitine), C18:2 carnitine (linoleyl carnitine), C2 carnitine (L-acetylcarnitine), C26 carnitine (hexacosanoyl carnitine), C3 carnitine (propionylcarnitine), C4 carnitine (butyrylcarnitine), C4-OH carnitine (3-hydroxybutyrylcarnitine), C5 carnitine (isovalerylcarnitine), C5:1 carnitine (tiglylcarnitine), C6 carnitine (hexanoylcarnitine), C8 carnitine (L-octanoylcarnitine), C9 carnitine (nonanoylcarnitine), C16 carnitine (L-palmitoylcarnitine), Carnitine (L-carnitine) |
| Cholesteryl ester (CE)             | C16:1 CE, C18:0 CE, C20:3 CE, C20:5 CE, C22:5 CE, C22:6 CE                                                                                                                                                                                                                                                                                                                                                                                                                                                                                                                                                                                                                                                                                                                                                                                                                |
| Ceramide                           | C16:0 Ceramide (d18:1), C22:0 Ceramide (d18:1), C24:0 Ceramide (d18:1), C24:1 Ceramide (d18:1)                                                                                                                                                                                                                                                                                                                                                                                                                                                                                                                                                                                                                                                                                                                                                                            |
| Diacylglycerol (DAG)               | C32:0 DAG, C32:1 DAG, C34:1 DAG, C34:2 DAG, C34:3 DAG, C36:1 DAG, C36:2 DAG, C36:3 DAG, C36:4 DAG, C38:4 DAG, C38:5 DAG                                                                                                                                                                                                                                                                                                                                                                                                                                                                                                                                                                                                                                                                                                                                                   |
| Lysophosphatidylcholine (LPC)      | C14:0 LPC, C16:1 LPC, C18:1 LPC, C18:2 LPC, C20:3 LPC, C20:4 LPC, C20:5 LPC, C22:6 LPC                                                                                                                                                                                                                                                                                                                                                                                                                                                                                                                                                                                                                                                                                                                                                                                    |
| Lysophosphatidylethanolamine (LPE) | C16:0 LPE, C18:0 LPE, C18:1 LPE, C18:2 LPE, C20:4 LPE, C22:6 LPE                                                                                                                                                                                                                                                                                                                                                                                                                                                                                                                                                                                                                                                                                                                                                                                                          |
| Phosphatidylcholine (PC)           | C34:2 PC plasmalogen, C36:1 PC plasmalogen, C36:2 PC plasmalogen, C36:4 PC plasmalogen, C36:5 PC plasmalogen, C38:4 PC plasmalogen, C38:7 PC plasmalogen, C30:0 PC, C30:1 PC, C32:1 PC, C32:2 PC, C34:1 PC, C36:1 PC, C36:4 PC-B, C38:3 PC, C38:6 PC, C40:10 PC, C40:6 PC, C40:9 PC                                                                                                                                                                                                                                                                                                                                                                                                                                                                                                                                                                                       |
| Phosphatidylethanolamine (PE)      | C34:3 PE plasmalogen, C36:2 PE plasmalogen, C36:3 PE plasmalogen, C36:4 PE plasmalogen, C36:5 PE plasmalogen, C38:5 PE plasmalogen, C38:6 PE plasmalogen, C38:7 PE plasmalogen, C40:7 PE plasmalogen, C34:0 PE, C34:2 PE, C36:0 PE, C36:1 PE, C36:2 PE, C36:3 PE, C36:4 PE, C38:4 PE, C38:5 PE, C38:6 PE                                                                                                                                                                                                                                                                                                                                                                                                                                                                                                                                                                  |
| Sphingomyelin (SM)                 | C14:0 SM, C18:2 SM, C22:1 SM                                                                                                                                                                                                                                                                                                                                                                                                                                                                                                                                                                                                                                                                                                                                                                                                                                              |



|                       |                                       |                                                                                                                                                                                                                                                                                                                                                                                                                                                                                |
|-----------------------|---------------------------------------|--------------------------------------------------------------------------------------------------------------------------------------------------------------------------------------------------------------------------------------------------------------------------------------------------------------------------------------------------------------------------------------------------------------------------------------------------------------------------------|
| Triacylglycerol (TAG) |                                       | C44:0 TAG, C46:0 TAG, C48:0 TAG, C50:0 TAG, C52:0 TAG, C46:1 TAG, C46:2 TAG, C48:1 TAG, C48:2 TAG, C48:3 TAG, C50:1 TAG, C50:2 TAG, C50:3 TAG, C50:4 TAG, C50:5 TAG, C50:6 TAG, C52:1 TAG, C52:2 TAG, C52:3 TAG, C52:4 TAG, C52:6 TAG, C52:7 TAG, C54:1 TAG, C54:2 TAG, C54:3 TAG, C54:4 TAG, C54:5 TAG, C54:6 TAG, C54:7 TAG, C54:8 TAG, C56:10 TAG, C56:2 TAG, C56:3 TAG, C56:5 TAG, C56:6 TAG, C56:7 TAG, C56:8 TAG, C56:9 TAG, C58:11 TAG, C58:7 TAG, C58:8 TAG, C58:9 TAG |
| Others                | Nitrogenous organic acid              | creatine                                                                                                                                                                                                                                                                                                                                                                                                                                                                       |
|                       | Amino acid glycine derivative         | dimethylglycine                                                                                                                                                                                                                                                                                                                                                                                                                                                                |
|                       | Organic compound, constituent of bile | taurine                                                                                                                                                                                                                                                                                                                                                                                                                                                                        |
|                       | Metabolite of nicotinamide            | 1-methylnicotinamide                                                                                                                                                                                                                                                                                                                                                                                                                                                           |
|                       | Carboxylic acid of piperidine         | pipecolic acid                                                                                                                                                                                                                                                                                                                                                                                                                                                                 |
|                       | TMAO                                  | trimethylamine-N-oxide                                                                                                                                                                                                                                                                                                                                                                                                                                                         |
|                       | Purine nucleoside                     | 1-methyladenosine                                                                                                                                                                                                                                                                                                                                                                                                                                                              |
|                       | Phosphatidylserine                    | C34:0 PS, C40:6 PS                                                                                                                                                                                                                                                                                                                                                                                                                                                             |
|                       | N-monomethyl-L-arginine               | NMMA                                                                                                                                                                                                                                                                                                                                                                                                                                                                           |
|                       | NG,NG-Dimethyl-L-arginine             | ADMA                                                                                                                                                                                                                                                                                                                                                                                                                                                                           |

---

**Figure S1** Flowchart of participant selection

*BMI analysis*

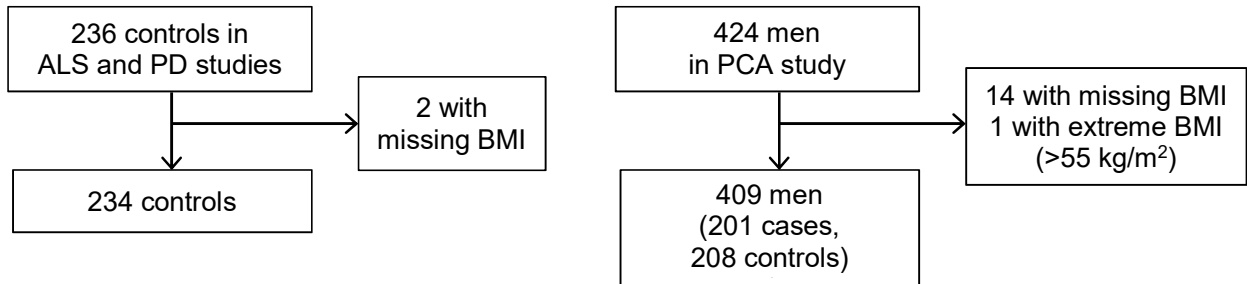

*Waist circumference analysis*

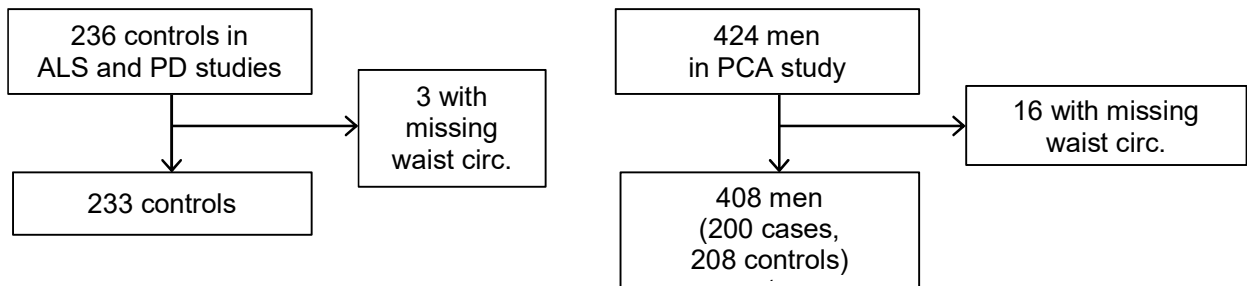

*Derived fat mass analysis*

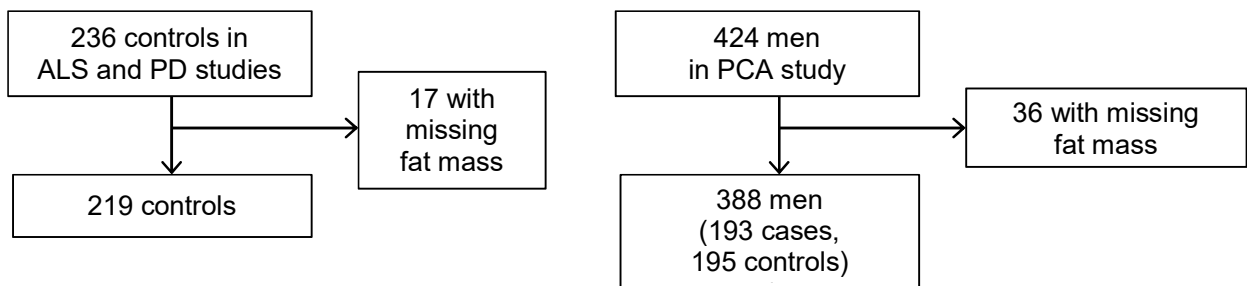

**Figure S2** Flowchart of metabolite selection

**ALS nested case-control study**

*C8-positive method (polar and non-polar lipids)*

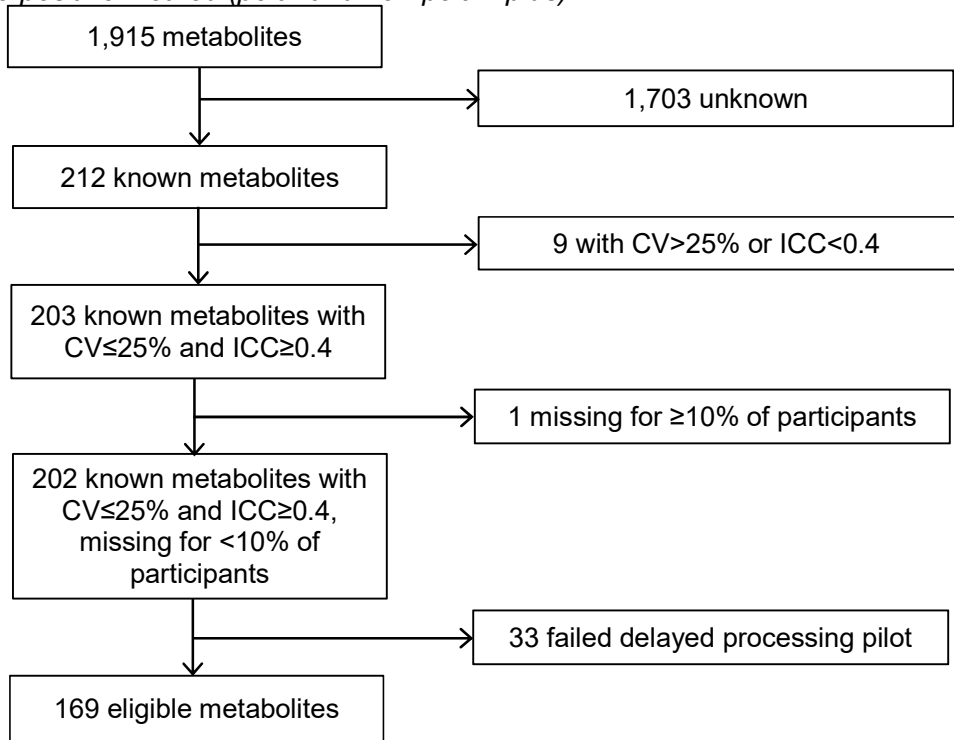

*HILIC-positive method (amino acids, dipeptides, and other cationic metabolites)*

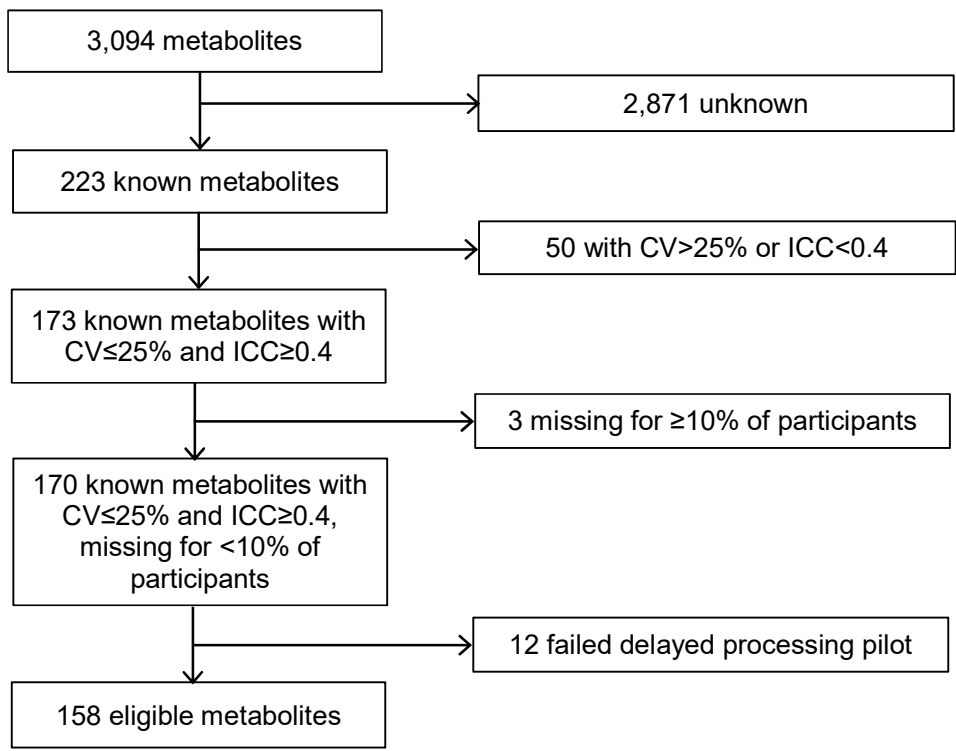

## PD nested case-control study

*C8-positive method (polar and non-polar lipids)*

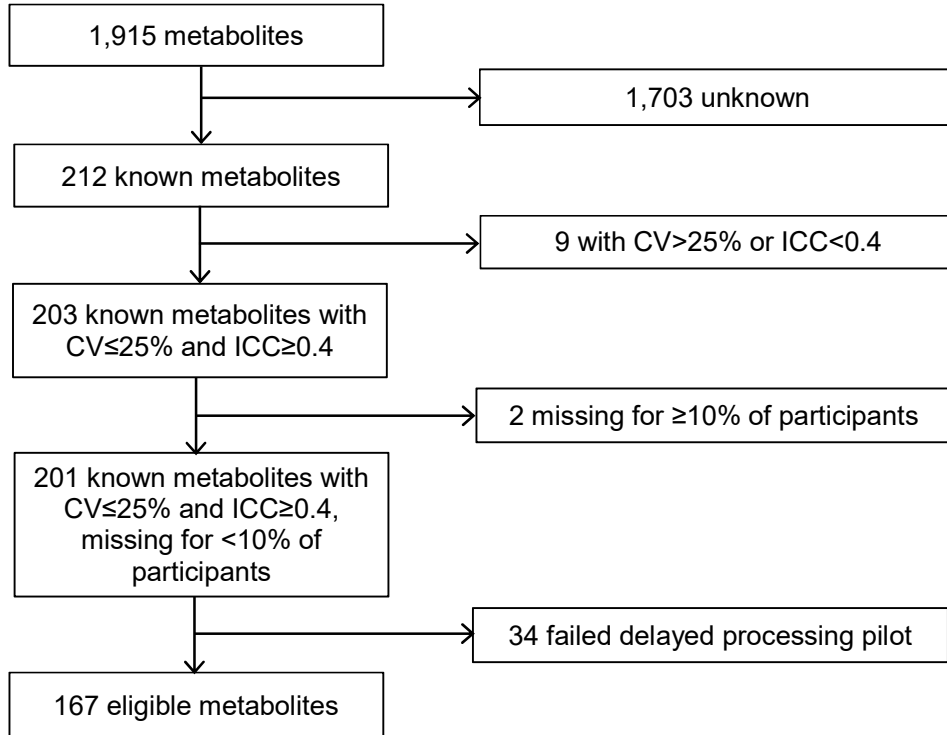

*HILIC-positive method (amino acids, dipeptides, and other cationic metabolites)*

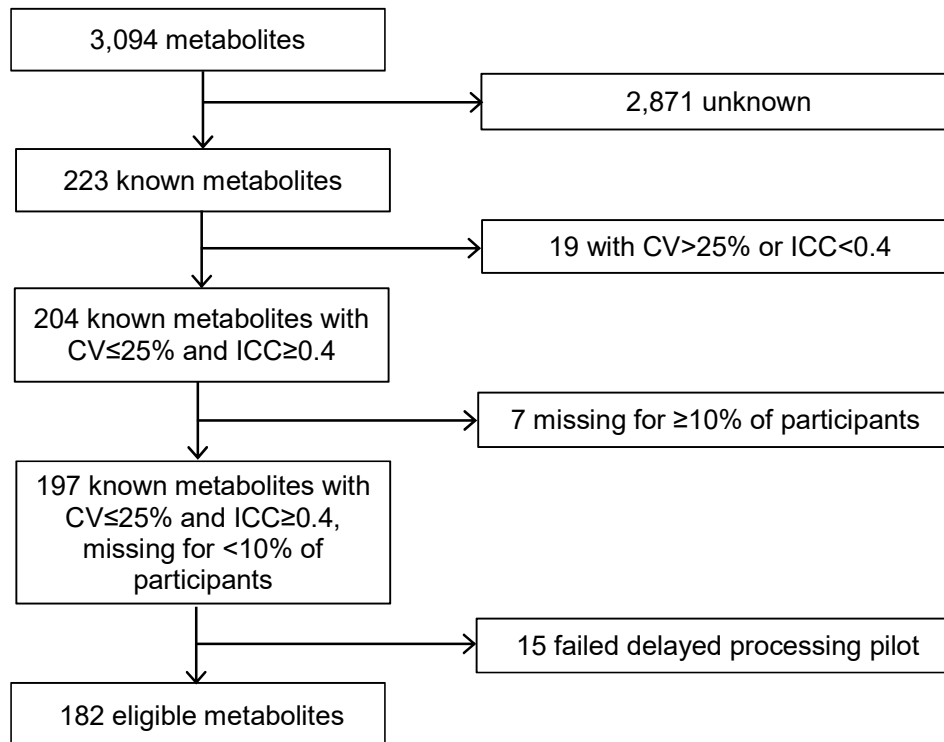

## PCA nested case-control study

*C8-positive method (polar and non-polar lipids)*

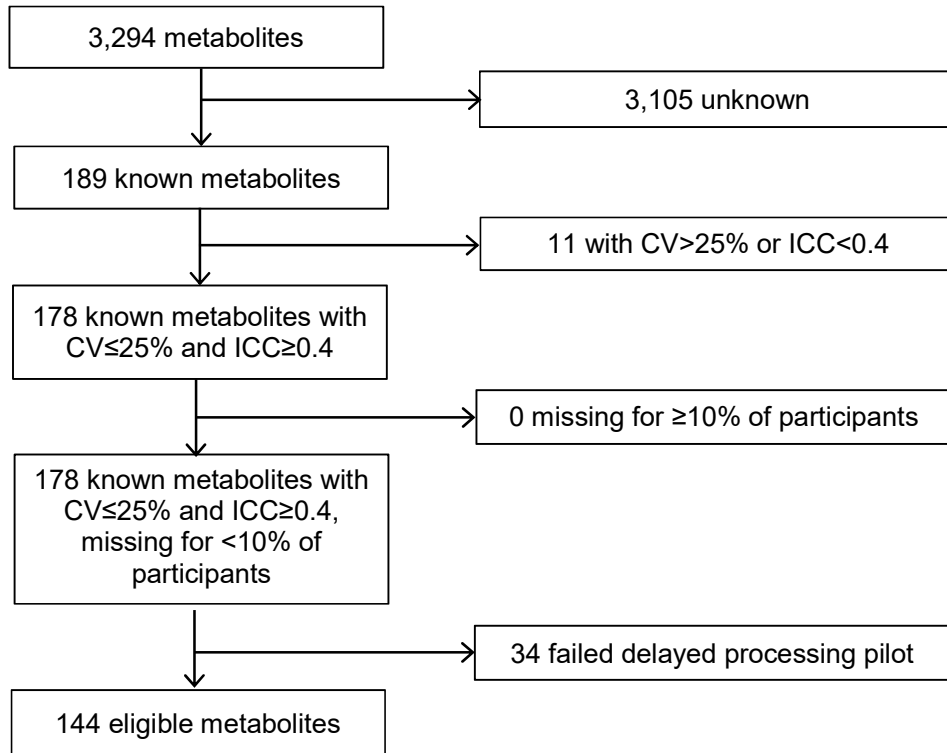

*HILIC-positive method (amino acids, dipeptides, and other cationic metabolites)*

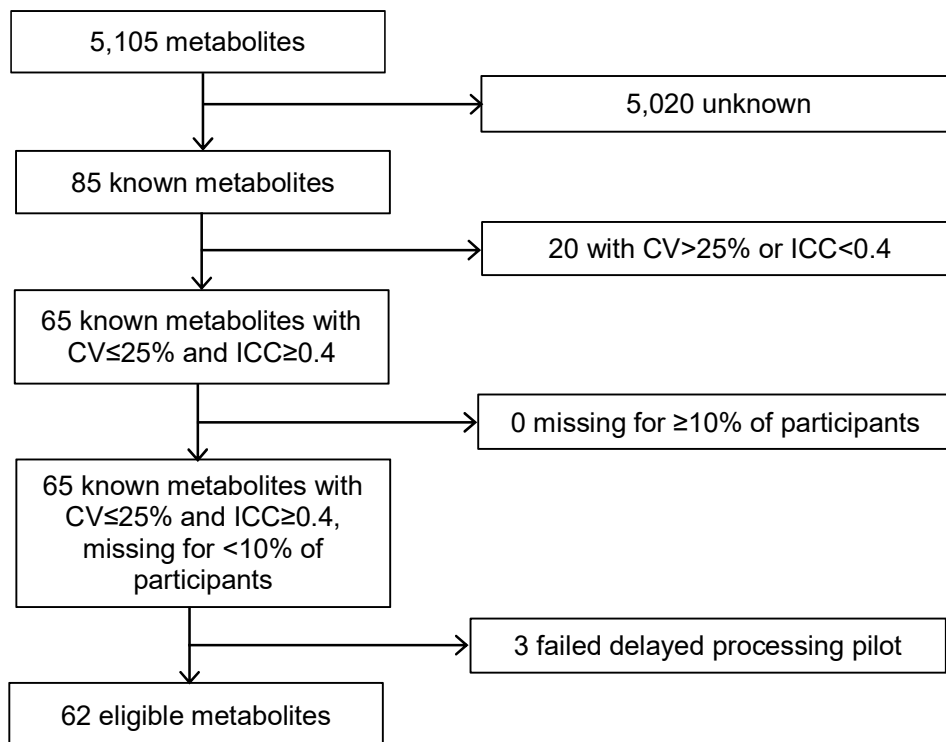

**Figure S3** Overlap in identified metabolites across adiposity measures (from Main Table 2)

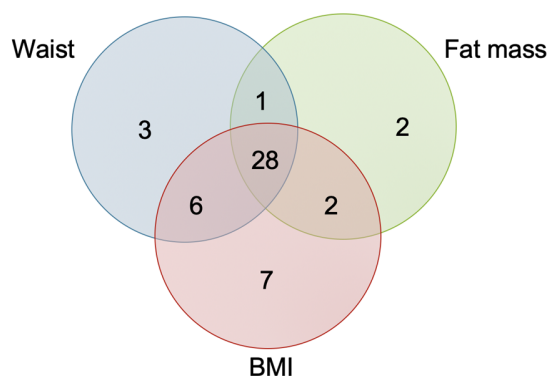

| Associated with                             | Metabolite name               |
|---------------------------------------------|-------------------------------|
| All three measures (n=28)                   | HMDB10386 HMDB07098 HMDB05367 |
|                                             | HMDB10397 HMDB07103 HMDB07219 |
|                                             | HMDB00123 HMDB05384 HMDB05376 |
|                                             | HMDB11503 HMDB05433 HMDB00641 |
|                                             | HMDB02815 HMDB05377 HMDB05432 |
|                                             | HMDB10404 HMDB07132 HMDB10412 |
|                                             | HMDB07102 HMDB07218 HMDB05403 |
|                                             | HMDB05369 HMDB07216 HMDB05359 |
|                                             | HMDB07099 HMDB10375 HMDB10419 |
|                                             | HMDB05360                     |
| BMI only (n=7)                              | HMDB11507 HMDB00688 HMDB02013 |
|                                             | HMDB11130 HMDB07199 HMDB11210 |
|                                             | HMDB11526                     |
| Waist circumference only (n=3)              | HMDB05435 HMDB05405 HMDB13326 |
| Fat mass only (n=2)                         | HMDB06733 HMDB00222           |
| BMI and waist circumference only (n=6)      | HMDB08047 HMDB00705 HMDB07248 |
|                                             | HMDB08057 HMDB05363 HMDB06347 |
| BMI and fat mass only (n=2)                 | HMDB11506 HMDB08511           |
| Waist circumference and fat mass only (n=1) | HMDB03331                     |

**Table S1** Metabolites associated with adiposity measures (FDR  $p$ -value  $<0.05$  and  $|r| \geq 0.15$ ) among 217 controls from nested case-control studies with data on all three adiposity measures, Health Professionals Follow-up Study, 1993-1996.

| HMDB ID <sup>a</sup> | Metabolite name | Body mass index                              |                | Waist circumference                          |                | Derived fat mass                             |                |
|----------------------|-----------------|----------------------------------------------|----------------|----------------------------------------------|----------------|----------------------------------------------|----------------|
|                      |                 | Pearson correlation coefficient <sup>b</sup> | FDR $p$ -value | Pearson correlation coefficient <sup>b</sup> | FDR $p$ -value | Pearson correlation coefficient <sup>b</sup> | FDR $p$ -value |
| <b>Amino acids</b>   |                 |                                              |                |                                              |                |                                              |                |
| HMDB00123            | glycine         | -0.30                                        | $<0.001$       | -0.21                                        | 0.03           | -0.25                                        | 0.01           |
| HMDB00641            | glutamine       | -0.20                                        | 0.02           | -0.18                                        | 0.05           | -0.18                                        | 0.04           |
| <b>Carnitines</b>    |                 |                                              |                |                                              |                |                                              |                |
| HMDB00688            | C5 carnitine    | 0.18                                         | 0.04           | --                                           | --             | --                                           | --             |
| HMDB06347            | C26 carnitine   | 0.18                                         | 0.04           | --                                           | --             | --                                           | --             |
| HMDB00705            | C6 carnitine    | --                                           | --             | 0.19                                         | 0.05           | --                                           | --             |
| HMDB00222            | C16 carnitine   | --                                           | --             | --                                           | --             | 0.18                                         | 0.04           |
| <b>Lipids</b>        |                 |                                              |                |                                              |                |                                              |                |
| <b>CE</b>            |                 |                                              |                |                                              |                |                                              |                |
| HMDB10375            | C22:5 CE        | -0.20                                        | 0.02           | -0.22                                        | 0.03           | -0.24                                        | 0.01           |
| HMDB06733            | C22:6 CE        | --                                           | --             | --                                           | --             | -0.19                                        | 0.04           |
| <b>DAG</b>           |                 |                                              |                |                                              |                |                                              |                |
| <i>Saturated</i>     |                 |                                              |                |                                              |                |                                              |                |
| HMDB07098            | C32:0 DAG       | 0.23                                         | 0.01           | 0.20                                         | 0.03           | 0.22                                         | 0.01           |
| <i>Unsaturated</i>   |                 |                                              |                |                                              |                |                                              |                |
| HMDB07102            | C34:1 DAG       | 0.24                                         | 0.01           | 0.22                                         | 0.03           | 0.24                                         | 0.01           |
| HMDB07099            | C32:1 DAG       | 0.23                                         | 0.01           | 0.22                                         | 0.03           | 0.24                                         | 0.01           |
| HMDB07103            | C34:2 DAG       | 0.22                                         | 0.01           | 0.22                                         | 0.03           | 0.23                                         | 0.01           |
| HMDB07216            | C36:1 DAG       | 0.21                                         | 0.02           | 0.21                                         | 0.03           | 0.22                                         | 0.01           |
| HMDB07218            | C36:2 DAG       | 0.21                                         | 0.02           | 0.20                                         | 0.03           | 0.21                                         | 0.02           |
| HMDB07132            | C34:3 DAG       | 0.21                                         | 0.02           | 0.22                                         | 0.03           | 0.23                                         | 0.01           |
| HMDB07219            | C36:3 DAG       | 0.19                                         | 0.03           | 0.19                                         | 0.04           | 0.20                                         | 0.03           |

|            |           |       |         |       |      |       |        |
|------------|-----------|-------|---------|-------|------|-------|--------|
| HMDB07248  | C36:4 DAG | --    | --      | --    | --   | 0.18  | 0.05   |
| <b>LPC</b> |           |       |         |       |      |       |        |
| HMDB10386  | C18:2 LPC | -0.36 | <0.0001 | -0.24 | 0.03 | -0.30 | <0.001 |
| HMDB10397  | C20:5 LPC | -0.35 | <0.0001 | -0.24 | 0.03 | -0.29 | <0.001 |
| HMDB02815  | C18:1 LPC | -0.31 | <0.001  | -0.23 | 0.03 | -0.27 | <0.01  |
| HMDB10404  | C22:6 LPC | -0.27 | <0.01   | -0.21 | 0.03 | -0.26 | 0.01   |
| <b>LPE</b> |           |       |         |       |      |       |        |
| HMDB11503  | C16:0 LPE | -0.29 | <0.001  | -0.20 | 0.03 | -0.23 | 0.01   |
| HMDB11507  | C18:2 LPE | -0.29 | <0.001  | --    | --   | -0.18 | 0.04   |
| HMDB11506  | C18:1 LPE | -0.24 | 0.01    | --    | --   | -0.19 | 0.03   |
| HMDB11130  | C18:0 LPE | -0.21 | 0.02    | --    | --   | --    | --     |
| HMDB11526  | C22:6 LPE | -0.20 | 0.02    | --    | --   | --    | --     |
| <b>PC</b>  |           |       |         |       |      |       |        |
| HMDB08047  | C38:3 PC  | 0.21  | 0.02    | --    | --   | --    | --     |
| HMDB08057  | C40:6 PC  | 0.19  | 0.03    | --    | --   | --    | --     |
| HMDB08511  | C40:10 PC | --    | --      | --    | --   | -0.18 | 0.04   |
| <b>TAG</b> |           |       |         |       |      |       |        |
| HMDB05369  | C52:2 TAG | 0.24  | 0.01    | 0.21  | 0.03 | 0.22  | 0.01   |
| HMDB05360  | C50:1 TAG | 0.23  | 0.01    | 0.19  | 0.04 | 0.22  | 0.01   |
| HMDB05384  | C52:3 TAG | 0.22  | 0.01    | 0.20  | 0.03 | 0.21  | 0.02   |
| HMDB05377  | C50:2 TAG | 0.22  | 0.01    | 0.19  | 0.04 | 0.21  | 0.02   |
| HMDB05433  | C50:3 TAG | 0.21  | 0.02    | 0.20  | 0.03 | 0.22  | 0.01   |
| HMDB05367  | C52:1 TAG | 0.21  | 0.02    | 0.19  | 0.04 | 0.21  | 0.02   |
| HMDB05376  | C48:2 TAG | 0.19  | 0.03    | --    | --   | 0.20  | 0.02   |
| HMDB05403  | C54:2 TAG | 0.18  | 0.04    | 0.19  | 0.05 | 0.19  | 0.03   |
| HMDB10412  | C46:1 TAG | 0.18  | 0.05    | --    | --   | 0.19  | 0.04   |
| HMDB05432  | C48:3 TAG | --    | --      | --    | --   | 0.19  | 0.03   |
| HMDB10419  | C46:2 TAG | --    | --      | --    | --   | 0.18  | 0.04   |
| HMDB05363  | C52:4 TAG | --    | --      | --    | --   | 0.18  | 0.04   |



**Purines,  
pyrimidines,  
and derivatives**

---

|           |                   |    |    |    |    |      |      |
|-----------|-------------------|----|----|----|----|------|------|
| HMDB03331 | 1-methyladenosine | -- | -- | -- | -- | 0.19 | 0.04 |
|-----------|-------------------|----|----|----|----|------|------|

---

Abbreviations: CE, cholesterol ester; DAG, diacylglycerol; LPC, lysophosphatidylcholine; LPE, lysophosphatidylethanolamine; PC, phosphatidylcholine; TAG, triacylglycerol.

---

<sup>a</sup> Representative HMDB IDs provided for PC, DAG, and TAG lipids.

<sup>b</sup> Estimates from partial Pearson correlation, adjusted for age (continuous) and smoking status (ever/never). 33 metabolites associated with BMI, 24 with waist circumference, 35 with derived fat mass.

**Table S2** Metabolites associated with adiposity measures (FDR  $p$ -value  $<0.05$  and  $|r| \geq 0.15$ ) among controls ( $n=118-126$ )<sup>a</sup> from nested case-control studies with fasting ( $\geq 8$  hours) blood samples, Health Professionals Follow-up Study, 1993-1996.

| HMDB ID <sup>b</sup> | Metabolite name        | Body mass index                              |                | Waist circumference                          |                | Derived fat mass                             |                |
|----------------------|------------------------|----------------------------------------------|----------------|----------------------------------------------|----------------|----------------------------------------------|----------------|
|                      |                        | Pearson correlation coefficient <sup>c</sup> | FDR $p$ -value | Pearson correlation coefficient <sup>c</sup> | FDR $p$ -value | Pearson correlation coefficient <sup>c</sup> | FDR $p$ -value |
| <b>Amino acids</b>   |                        |                                              |                |                                              |                |                                              |                |
| HMDB00123            | glycine                | -0.32                                        | $<0.01$        | --                                           | --             | -0.31                                        | 0.01           |
| HMDB00883            | valine                 | 0.23                                         | 0.04           | --                                           | --             | --                                           | --             |
| <b>Lipids</b>        |                        |                                              |                |                                              |                |                                              |                |
| <b>CE</b>            |                        |                                              |                |                                              |                |                                              |                |
| HMDB06733            | C22:6 CE               | -0.26                                        | 0.02           | --                                           | --             | -0.28                                        | 0.01           |
| HMDB10375            | C22:5 CE               | -0.24                                        | 0.03           | -0.23                                        | 0.05           | -0.24                                        | 0.04           |
| <b>Ceramide</b>      |                        |                                              |                |                                              |                |                                              |                |
| HMDB04952            | C22:0 Ceramide (d18:1) | --                                           | --             | 0.23                                         | 0.05           | --                                           | --             |
| HMDB04953            | C24:1 Ceramide (d18:1) | --                                           | --             | 0.24                                         | 0.03           | --                                           | --             |
| <b>DAG</b>           |                        |                                              |                |                                              |                |                                              |                |
| <i>Saturated</i>     |                        |                                              |                |                                              |                |                                              |                |
| HMDB07098            | C32:0 DAG              | 0.36                                         | $<0.01$        | 0.34                                         | $<0.01$        | 0.35                                         | $<0.01$        |
| <i>Unsaturated</i>   |                        |                                              |                |                                              |                |                                              |                |
| HMDB07102            | C34:1 DAG              | 0.35                                         | $<0.01$        | 0.35                                         | $<0.01$        | 0.35                                         | $<0.01$        |
| HMDB07099            | C32:1 DAG              | 0.33                                         | $<0.01$        | 0.34                                         | $<0.01$        | 0.34                                         | $<0.01$        |
| HMDB07216            | C36:1 DAG              | 0.32                                         | $<0.01$        | 0.32                                         | $<0.01$        | 0.31                                         | 0.01           |
| HMDB07218            | C36:2 DAG              | 0.31                                         | 0.01           | 0.33                                         | $<0.01$        | 0.31                                         | 0.01           |
| HMDB07103            | C34:2 DAG              | 0.31                                         | 0.01           | 0.33                                         | $<0.01$        | 0.31                                         | 0.01           |
| HMDB07132            | C34:3 DAG              | 0.25                                         | 0.03           | 0.27                                         | 0.02           | 0.25                                         | 0.03           |
| HMDB07219            | C36:3 DAG              | 0.25                                         | 0.03           | 0.26                                         | 0.02           | --                                           | --             |
| <b>LPC</b>           |                        |                                              |                |                                              |                |                                              |                |
| HMDB10386            | C18:2 LPC              | -0.34                                        | $<0.01$        | -0.27                                        | 0.02           | -0.37                                        | $<0.01$        |

|                    |           |       |       |       |       |       |       |
|--------------------|-----------|-------|-------|-------|-------|-------|-------|
| HMDB10397          | C20:5 LPC | -0.33 | <0.01 | -0.26 | 0.02  | -0.35 | <0.01 |
| HMDB10404          | C22:6 LPC | -0.32 | <0.01 | -0.23 | 0.05  | -0.37 | <0.01 |
| HMDB02815          | C18:1 LPC | -0.28 | 0.01  | --    | --    | -0.31 | 0.01  |
| HMDB10395          | C20:4 LPC | --    | --    | --    | --    | -0.25 | 0.03  |
| <b>LPE</b>         |           |       |       |       |       |       |       |
| HMDB11503          | C16:0 LPE | -0.26 | 0.02  | --    | --    | -0.26 | 0.02  |
| HMDB11526          | C22:6 LPE | -0.26 | 0.02  | --    | --    | -0.25 | 0.04  |
| HMDB11507          | C18:2 LPE | -0.26 | 0.02  | --    | --    | --    | --    |
| <b>PC</b>          |           |       |       |       |       |       |       |
| HMDB08047          | C38:3 PC  | 0.27  | 0.01  | 0.28  | 0.01  | 0.25  | 0.03  |
| HMDB08057          | C40:6 PC  | 0.25  | 0.03  | 0.27  | 0.02  | --    | --    |
| <b>TAG</b>         |           |       |       |       |       |       |       |
| <i>Saturated</i>   |           |       |       |       |       |       |       |
| HMDB05365          | C52:0 TAG | 0.30  | 0.01  | 0.29  | 0.01  | 0.27  | 0.02  |
| HMDB42063          | C44:0 TAG | 0.30  | 0.01  | 0.28  | 0.01  | 0.30  | 0.01  |
| HMDB05356          | C48:0 TAG | 0.29  | 0.01  | 0.25  | 0.02  | 0.27  | 0.02  |
| HMDB05357          | C50:0 TAG | 0.28  | 0.01  | 0.25  | 0.02  | 0.26  | 0.03  |
| HMDB10411          | C46:0 TAG | 0.27  | 0.01  | 0.24  | 0.03  | 0.27  | 0.02  |
| <i>Unsaturated</i> |           |       |       |       |       |       |       |
| HMDB05360          | C50:1 TAG | 0.36  | <0.01 | 0.35  | <0.01 | 0.36  | <0.01 |
| HMDB05377          | C50:2 TAG | 0.35  | <0.01 | 0.35  | <0.01 | 0.35  | <0.01 |
| HMDB05369          | C52:2 TAG | 0.34  | <0.01 | 0.34  | <0.01 | 0.34  | <0.01 |
| HMDB05367          | C52:1 TAG | 0.33  | <0.01 | 0.32  | <0.01 | 0.32  | 0.01  |
| HMDB05433          | C50:3 TAG | 0.33  | <0.01 | 0.34  | <0.01 | 0.33  | <0.01 |
| HMDB05376          | C48:2 TAG | 0.31  | 0.01  | 0.32  | <0.01 | 0.32  | 0.01  |
| HMDB05359          | C48:1 TAG | 0.31  | 0.01  | 0.30  | 0.01  | 0.32  | 0.01  |
| HMDB10412          | C46:1 TAG | 0.30  | 0.01  | 0.29  | 0.01  | 0.31  | 0.01  |
| HMDB05395          | C54:1 TAG | 0.30  | 0.01  | 0.32  | <0.01 | 0.29  | 0.01  |
| HMDB05403          | C54:2 TAG | 0.30  | 0.01  | 0.33  | <0.01 | 0.30  | 0.01  |

|                                 |           |      |      |      |      |      |      |
|---------------------------------|-----------|------|------|------|------|------|------|
| HMDB05384                       | C52:3 TAG | 0.28 | 0.01 | 0.29 | 0.01 | 0.27 | 0.02 |
| HMDB10419                       | C46:2 TAG | 0.28 | 0.01 | 0.29 | 0.01 | 0.29 | 0.01 |
| HMDB05432                       | C48:3 TAG | 0.27 | 0.01 | 0.30 | 0.01 | 0.29 | 0.01 |
| HMDB05404                       | C56:2 TAG | 0.24 | 0.04 | 0.26 | 0.02 | --   | --   |
| HMDB05435                       | C50:4 TAG | --   | --   | 0.26 | 0.02 | --   | --   |
| HMDB05410                       | C56:3 TAG | --   | --   | 0.24 | 0.03 | --   | --   |
| HMDB05405                       | C54:3 TAG | --   | --   | 0.26 | 0.02 | --   | --   |
| <b>Nitrogenous organic acid</b> |           |      |      |      |      |      |      |
| HMDB00064                       | creatine  | 0.24 | 0.04 | --   | --   | --   | --   |

Abbreviations: CE, cholesterol ester; DAG, diacylglycerol; LPC, lysophosphatidylcholine; LPE, lysophosphatidylethanolamine; PC, phosphatidylcholine; TAG, triacylglycerol.

<sup>a</sup> The number of men contributing to each analysis was 125 for BMI, 126 for waist circumference, 118 for derived fat mass.

<sup>b</sup> Representative HMDB IDs provided for PC, DAG, and TAG lipids.

<sup>c</sup> Estimates from partial Pearson correlation, adjusted for age (continuous) and smoking status (ever/never). 41 metabolites associated with BMI, 38 with waist circumference, 36 with derived fat mass.

## File S2. Lasso models used for predicting adiposity using associated metabolites

### Model 1 BMI model

Dependent variable: BMI (kg/m<sup>2</sup>)

```
(Intercept)      25.531249633
Z_LN_HMDB02815  .
Z_LN_HMDB05359  .
Z_LN_HMDB05360  .
Z_LN_HMDB05363  .
Z_LN_HMDB05367  0.035434842
Z_LN_HMDB05369  .
Z_LN_HMDB05376  .
Z_LN_HMDB05377  .
Z_LN_HMDB05384  .
Z_LN_HMDB05403  .
Z_LN_HMDB05432  .
Z_LN_HMDB05433  .
Z_LN_HMDB07098  0.327006229
Z_LN_HMDB07099  .
Z_LN_HMDB07102  .
Z_LN_HMDB07103  .
Z_LN_HMDB07132  .
Z_LN_HMDB07199  0.002574509
Z_LN_HMDB07216  .
Z_LN_HMDB07218  .
Z_LN_HMDB07219  .
Z_LN_HMDB07248  0.149999338
Z_LN_HMDB08047  0.286568241
Z_LN_HMDB08057  .
Z_LN_HMDB08511 -0.097942617
Z_LN_HMDB10375  .
Z_LN_HMDB10386 -0.144544559
Z_LN_HMDB10397 -0.082997714
Z_LN_HMDB10404  .
Z_LN_HMDB10412  0.099054476
Z_LN_HMDB10419  .
Z_LN_HMDB11130  .
Z_LN_HMDB11210  .
Z_LN_HMDB11503 -0.670392913
Z_LN_HMDB11506  .
Z_LN_HMDB11507 -0.183100200
Z_LN_HMDB11526  .
Z_LN_HMDB00123 -0.242880442
Z_LN_HMDB00641 -0.228753242
Z_LN_HMDB00688  .
Z_LN_HMDB00705  .
Z_LN_HMDB02013  0.174925769
Z_LN_HMDB06347  0.272082992
```

### Model 2 Waist circumference model

Dependent variable: Waist circumference (cm)

```
(Intercept)      95.2876910
Z_LN_HMDB02815  -0.2607707
Z_LN_HMDB05359  .
```

Z\_LN\_HMDB05360 .  
Z\_LN\_HMDB05363 .  
Z\_LN\_HMDB05367 .  
Z\_LN\_HMDB05369 .  
Z\_LN\_HMDB05376 .  
Z\_LN\_HMDB05377 .  
Z\_LN\_HMDB05384 .  
Z\_LN\_HMDB05403 0.2957983  
Z\_LN\_HMDB05405 .  
Z\_LN\_HMDB05432 .  
Z\_LN\_HMDB05433 .  
Z\_LN\_HMDB05435 .  
Z\_LN\_HMDB07098 .  
Z\_LN\_HMDB07099 0.2622919  
Z\_LN\_HMDB07102 0.3253620  
Z\_LN\_HMDB07103 .  
Z\_LN\_HMDB07132 .  
Z\_LN\_HMDB07216 0.3920670  
Z\_LN\_HMDB07218 .  
Z\_LN\_HMDB07219 .  
Z\_LN\_HMDB07248 .  
Z\_LN\_HMDB08047 0.4903875  
Z\_LN\_HMDB08057 .  
Z\_LN\_HMDB10375 -0.2535561  
Z\_LN\_HMDB10386 -0.5293353  
Z\_LN\_HMDB10397 .  
Z\_LN\_HMDB10404 -0.3723265  
Z\_LN\_HMDB10412 .  
Z\_LN\_HMDB10419 .  
Z\_LN\_HMDB11503 -0.7386762  
Z\_LN\_HMDB00123 .  
Z\_LN\_HMDB00641 -1.0275656  
Z\_LN\_HMDB00705 0.1027872  
Z\_LN\_HMDB03331 0.8122641  
Z\_LN\_HMDB06347 1.0358597  
Z\_LN\_HMDB13326 0.5154372

### Model 3 Fat mass model

Dependent variable: Derived fat mass (kg)

|                |               |
|----------------|---------------|
| (Intercept)    | 21.7917898823 |
| Z_LN_HMDB02815 | -0.4020370190 |
| Z_LN_HMDB05359 | -1.5255249821 |
| Z_LN_HMDB05360 | .             |
| Z_LN_HMDB05367 | 1.1497788112  |
| Z_LN_HMDB05369 | .             |
| Z_LN_HMDB05376 | .             |
| Z_LN_HMDB05377 | .             |
| Z_LN_HMDB05384 | -0.7831811168 |
| Z_LN_HMDB05403 | .             |
| Z_LN_HMDB05432 | 1.3358576755  |
| Z_LN_HMDB05433 | .             |
| Z_LN_HMDB06733 | 1.0052774695  |
| Z_LN_HMDB07098 | 0.0157630573  |
| Z_LN_HMDB07099 | .             |
| Z_LN_HMDB07102 | 0.5981972979  |
| Z_LN_HMDB07103 | -0.0919940811 |
| Z_LN_HMDB07132 | 0.0001796992  |
| Z_LN_HMDB07216 | .             |
| Z_LN_HMDB07218 | .             |
| Z_LN_HMDB07219 | 0.3776334578  |
| Z_LN_HMDB08511 | -0.3002406728 |
| Z_LN_HMDB10375 | -0.5037533119 |
| Z_LN_HMDB10386 | .             |
| Z_LN_HMDB10397 | 0.0347104906  |
| Z_LN_HMDB10404 | -1.0242727239 |
| Z_LN_HMDB10412 | 0.4452927910  |
| Z_LN_HMDB10419 | .             |
| Z_LN_HMDB11503 | -0.7353253207 |
| Z_LN_HMDB11506 | .             |
| Z_LN_HMDB00123 | -0.4303850733 |
| Z_LN_HMDB00222 | 1.1136072086  |
| Z_LN_HMDB00641 | -0.5580088922 |
| Z_LN_HMDB03331 | 0.2424098130  |
